# An international factorial vignette-based survey of intubation decisions in acute hypoxemic respiratory failure

Yarnell, Christopher J, MD PhD; ORCID 0000-0001-5657-9398  
Paranthaman, Arviy RRT;  
Reardon, Peter MD; ORCID 0000-0003-2118-1229  
Angriman, Federico MD MPH PhD; ORCID 0000-0003-0971-386X  
Bassi, Thiago; ORCID 0000-0001-5570-5057  
Bellani, Giacomo; ORCID 0000-0002-3089-205X  
Brochard, Laurent;  
De Grooth, Harm Jan; ORCID 0000-0002-7499-076X  
Dragoi, Laura; ORCID 0000-0003-2201-8116  
Gaus, Syafruddin MD PhD; ORCID 0000-0003-0380-0954  
Glover, Paul MD;  
Goligher, Ewan C, MD PhD;  
Lewis, Kimberley;  
Li, Baoli;  
Kareemi, Hashim; ORCID 0000-0001-8599-1576  
Tirupakuzhi Vijayaraghavan, Bharath Kumar; ORCID 0000-0002-1801-0667  
Mehta, Sangeeta; ORCID 0000-0002-7073-4769  
Mellado-Artigas, Ricard; ORCID 0000-0003-2815-6819  
Moore, Julie; ORCID 0000-0002-7786-4347  
Morris, Idunn MBChB(Hons) FRCA FCICM;  
Roman-Sarita, Georgiana RRT;  
Pham, Tai MD, PhD; ORCID 0000-0002-4373-0711  
Sereeyotin, Jariya; ORCID 0000-0002-2880-8242  
Tomlinson, George;  
Wozniak, Hannah MD; ORCID 0000-0001-5404-4621  
Yoshida, Takeshi MD PhD; ORCID 0000-0002-4695-5377  
Fowler, Rob;  
for the Canadian Critical Care Trials Group

2024-04-20

Abstract: 267 words

Text: 3,004 words (including headers)

## Author details

### Affiliations

- Department of Critical Care Medicine, Scarborough Health Network, Toronto, Ontario, Canada (CJY, PR, AP)
- Scarborough Health Network Research Institute, Toronto, Ontario, Canada (CJY)
- Keenan Research Centre for Biomedical Research, Li Ka Shing Knowledge Institute, St Michael's Hospital, Unity Health Toronto, Canada (LB)
- Interdepartmental Division of Critical Care Medicine, University of Toronto, Toronto, Canada (CJY, FA, LD, RAF, LB, SM, HW, ECG, TB)
- Department of Medicine, Division of Respiriology, University Health Network
- Department of Medicine, Sinai Health System, Toronto, Canada (SM)
- Department of Medicine, University of Toronto, Toronto, Canada (RAF)
- Department of Respiratory Therapy, University Health Network, Toronto, Canada (GRS)
- Department of Medicine, University Health Network, Toronto, Canada (GT)
- Institute for Clinical Evaluative Sciences, Toronto, Canada (RAF)
- Institute of Health Policy, Management and Evaluation, University of Toronto, Canada (RAF, GT)
- Sunnybrook Health Sciences Centre, Toronto, Canada (FA, RAF)
- Division of Critical Care, Department of Medicine, McMaster University, Hamilton, Canada (KL)
- Department of Health Research, Methods, Evidence, and Impact, McMaster University, Hamilton, Canada (KL)

- Service de Medecine Intensive-Réanimation, Assistance Publique–Hôpitaux de Paris, Hôpital de Bicêtre, DMU CORREVE, FHU SEPSIS, Groupe de Recherche CARMAS, Le Kremlin-Bicêtre, France (TP)
- Universite Paris-Saclay, Université de Versailles Saint-Quentin-en-Yvelines, Université Paris-Sud, Inserm U1018, Equipe d’Epidemiologie Respiratoire Intégrative, Centre d’Epidémiologie et de Santé des Populations, Villejuif, France (TP)
- Surgical ICU, Department of Anesthesiology, Hospital Clínic de Barcelona, Barcelona (Spain) [RMA]
- Lawrence S. Bloomberg Faculty of Nursing, University of Toronto, Toronto, Canada [JM]
- Trent-Fleming School of Nursing, Trent University, Peterborough, Ontario [JM]
- Department of Nursing, Mount Sinai Hospital, Toronto, Canada [JM, BL]
- Nepean Clinical School, University of Sydney, New South Wales, Australia (IM)
- Department of Intensive Care Medicine, Nepean Hospital, Sydney, Australia (IM)
- Department of Physiology, University of Toronto, Toronto, Canada (IM, ECG)
- Intensive Care Center, UMC Utrecht, Utrecht, The Netherlands (HJdG)
- Department of Anesthesiology, Pharmacology, Intensive Care and Emergency Medicine, Geneva University Hospitals, Geneva, Switzerland (HW)
- Centre for Medical Sciences (CISMed), University of Trento, 38122, Trento, Italy (GB)
- Anaesthesia and Intensive Care, Santa Chiara Hospital, APSS, Trento, Italy (GB)
- Department of Critical Care Medicine, Apollo Hospitals, Chennai, India and Centre for Inflammation Research, University of Edinburgh, U.K. (BKTV)

- Department of Anesthesiology, Division of Critical Care Medicine, King Chulalongkorn Memorial Hospital and Faculty of Medicine, Chulalongkorn University, Bangkok, Thailand (JS)
- Department of Emergency Medicine, University of British Columbia, Vancouver, Canada (HK)
- The Department of Anesthesiology and Intensive Care Medicine, Osaka University Graduate School of Medicine, Suita, Japan (TY)
- Department of Anesthesiology, Intensive Care, and Pain Management ; Faculty of Medicine, Hasanuddin University, Makassar, Indonesia(GS)
- Northern Ontario School of Medicine, Timmins and District Hospital, Timmins, Ontario, Canada (PG)

## Contributions

- Concept: CJY, RF, GT, KL, SM
- Design: CJY, RF, GT, KL, SM, PR, AP, IM, FA, HJdG
- Data analysis and interpretation: All
- Data acquisition: All
- Drafting, revising for important intellectual content, final approval, and agreement to be accountable: All

## Corresponding author

Christopher Yarnell

Department of Critical Care Medicine, Scarborough Health Network

3050 Lawrence Ave E, Toronto, Ontario, Canada, M1P 2V5

[cyarnell@shn.ca](mailto:cyarnell@shn.ca)

## Declarations of interest

Dr Brochard's laboratory received grants from Medtronic, Stimit, Vitalaire, equipment from Philips, Sentec, Fisher Paykel, Cerebra Health. Dr Ricard Mellado-Artigas has received lecturing fees from Medtronic, MSD and Fisher and Paykel. Dr. Bellani receives lecturing fees from Draeger Medical and consultancy fees from Flowmeter.

## Funding and role of funders in study

Survey dissemination costs were covered by an Interdepartmental Division of Critical Care Medicine Trainee Award to Dr Yarnell. Dr Fowler is the H. Barrie Fairley Professor of Critical Care at the University Health Network, Interdepartmental Division of Critical Care Medicine, University of Toronto. Funders had no role in the design and conduct of the study; collection, management, analysis, and interpretation of the data; preparation, review, or approval of the manuscript; nor in the decision to submit the manuscript for publication. The opinions, results and conclusions reported in this paper are those of the authors and are independent from the funding sources. No endorsement by any of the funding agencies is intended or should be inferred.

## Acknowledgements

We thank Dr Oleksa Rewa and Dr John Basmaji for comments on a draft of the manuscript. We thank the following for endorsement and/or dissemination: Australia New Zealand Intensive Care Society, Canadian Association of Critical Care Nurses, Canadian Association of Emergency Physicians, Canadian Critical Care Society, Canadian Society of Respiratory Therapists, the European Society of Intensive Care Medicine, Indian Registry of Intensive care and the Chennai branch of the Indian Society of Critical Care Medicine, Intensive Care Society (United Kingdom), Japanese Society of Respiratory Care, Pleural Pressure Working Group, Platform of Randomized Adaptive Clinical Trials in Critical Illness investigator group, Pragmatic Critical Care Research Group, REVA Network, Society for Critical Care Medicine, Societa' Italiano di Anestesia,

Analgesia, Rianimazione e Terapia Intensiva (SIAARTI), la Société de Réanimation de Langue Française (SRLF), and the Thai Society of Critical Care Medicine (TSCCM).

## Take-home message

In this international, interprofessional survey of 2,294 individuals from 74 countries on when to intubate patients with acute hypoxemic respiratory failure, low oxygen saturation, high inspired oxygen fraction, abnormal breathing patterns, and decreased level of consciousness were associated with recommending intubation. There was important variation among individuals and countries, suggesting an opportunity to improve care by studying the relationship between decision-making and outcomes.

## Keywords

Acute Hypoxemic Respiratory Failure, Endotracheal Intubation, Healthcare Surveys, Multilevel Analyses

## Abstract

*Purpose:* Intubation is a common procedure in acute hypoxemic respiratory failure (AHRF), with minimal evidence to guide decision-making. We conducted a survey of when to intubate patients with AHRF to measure the influence of clinical variables on intubation decision-making and quantify variability.

*Methods:* We developed an anonymous factorial vignette-based web survey to ask clinicians involved in the decision to intubate “Would you recommend intubation?” Respondents selected an ordinal recommendation from a 5-point scale ranging from “Definite no” to “Definite yes” for up to 10 randomly allocated vignettes. We disseminated the survey through clinical and academic societies, analyzed responses using Bayesian proportional odds modeling with clustering by individual, country, and region, and reported mean odds ratios (OR) with 95% credible intervals (CrI).

*Results:* Between September 2023 and January 2024, 2,294 respondents entered 17,235 vignette responses in 74 countries [most common: Canada (29%), USA (26%), France (9%), Japan (8%), and Thailand (5%)]. Respondents were attending physicians (63%), nurses (13%), trainee physicians (9%), respiratory therapists (9%), other (6%). Lower oxygen saturation, higher inspired oxygen fraction, non-invasive ventilation compared to high-flow, tachypnea, neck muscle use, abdominal paradox, drowsiness, and inability to obey were associated with increased odds of intubation; diagnosis, vasopressors, and duration of symptoms were not. Within a country the odds of recommending intubation changed between clinicians by an average factor of 2.60, while changing between countries within a region changed it by 1.56.

*Conclusion:* In this international, interprofessional survey of more than 2000 practicing clinicians, intubation for patients with AHRF was mostly decided based on oxygenation, breathing pattern, and consciousness, but there was important variation across individuals and countries.



## 1 Introduction

2 When to intubate people with acute hypoxemic respiratory failure (AHRF) is an important and  
3 common dilemma for clinicians, but optimal criteria to guide initiation are unknown(1).  
4 Uncertainty in this decision is important, because earlier intubation may unnecessarily expose  
5 patients to risks of periprocedural shock and cardiac arrest(2), laryngeal and dental trauma(3),  
6 infection(4), ventilator-induced lung injury(5), immobility and weakness(6), and delirium and  
7 post-traumatic stress disorder(7); later intubation may increase the risk of death due to  
8 physiologically dangerous intubating conditions(8), worsening of self-inflicted lung injury(9), or  
9 decompensated respiratory failure progressing to cardiac arrest(10).

10 In qualitative research and surveys, clinicians have highlighted the importance of physiologic  
11 variables such as degree of hypoxemia and breathing pattern in deciding when to intubate(11–  
12 13). However, there is variation in the use of invasive ventilation by location, time period, and  
13 patient race(14–18). No research yet investigates the relationships between physiological  
14 variables and intubation decisions, and the extent of variability in decision-making between  
15 individuals and around the world is unknown.

16 To address these uncertainties, we conducted an international, scenario-based electronic  
17 survey to quantify variability in practice and measure the influence of clinical variables on  
18 intubation decisions for patients with AHRF.

## 19 Methods

20 We designed and disseminated an anonymous electronic survey using established  
21 methods.(19,20) We obtained approval from the Scarborough Health Network research ethics

22 board (#ICU-23-009). Completion of the survey implied consent. We pre-registered the analysis  
23 plan prior to completion of data collection(21) and analytic code is publicly available.(cite doi)

## 24 [Participants](#)

25 We targeted a global population of clinicians who self-identified as “involved in the decision to  
26 initiate invasive ventilation for respiratory failure as part of their clinical practice.” Because we  
27 targeted a global population of diverse professions, we could not ascertain a denominator for  
28 calculating response rates.(22)

## 29 [Development and piloting](#)

30 We identified key physiologic variables hypothesized to influence intubation decisions using  
31 randomized trials(23), observational studies of thresholds for intubation (15,24), research on  
32 mechanical ventilation weaning physiology(25–28), and our clinical experience with patients  
33 experiencing respiratory failure. We performed clinical sensibility testing with 8 clinicians who  
34 are involved in intubation decisions (2 respiratory therapists, 4 physicians, 2 nurses) and revised  
35 the survey based on that feedback.(19,29)

## 36 [Survey design](#)

37 We designed a factorial vignette-based survey.(30–32) Variables were patient age, premorbid  
38 frailty(33), diagnosis, oxygen saturation, inspired oxygen fraction, oxygen device, respiratory  
39 rate, breathing pattern, norepinephrine use, level of consciousness, and duration in current  
40 state(eTable 1). Variables were randomly combined to generate vignettes for respondents. This  
41 design guarded against question order bias(34), allowed for detailed exploration of  
42 interactions(35), and minimized the impact of bias due to the perception of being either  
43 observed (Hawthorne effect) or evaluated (sentinel effect)(30). After discretizing continuous

44 variables (eg. respiratory rate) and introducing clinically relevant covariance (eg. removing  
45 norepinephrine from vignettes with a diagnosis of COVID), there were 1.25 million potential  
46 vignettes.

47 The survey began with a questionnaire to gather respondent demographics (eFigures 1 and 2)  
48 including clinical role, primary clinical area of practice, duration in practice, and country of  
49 practice. We then presented respondents with 10 randomly allocated tabular vignettes (eFigure  
50 3).

51 For each vignette, respondents were asked “Would you recommend intubation and invasive  
52 ventilation?” and selected an ordinal response from “Definite no”, “Probable no”, “Uncertain”,  
53 “Probable yes”, to “Definite yes.” Respondents could also indicate if any of 6 additional  
54 information types would be helpful for their decision (arterial blood gas, chest radiography,  
55 positive end-expiratory pressure (PEEP), tidal volume measurement, esophageal manometry, or  
56 more observation time, eFigure 4).

### 57 [Translation and dissemination](#)

58 The English survey was translated by fluent clinicians into Indonesian, Chinese (simplified),  
59 French, German, Italian, Japanese, Portuguese, Spanish, and Thai. The survey was disseminated  
60 through and/or endorsed by several societies and networks listed in the Acknowledgments.

### 61 [Descriptive analyses](#)

62 We reported the number of respondents according to characteristics. Regions, sub-regions, and  
63 countries were defined using the ISO 3166 country codes.(36) We reported the total, number

64 per respondent, the distribution of responses by respondent characteristics, and the number  
65 requesting each additional information type.

### 66 Primary analysis

67 We analyzed the ordinal intubation recommendation outcome with a Bayesian multilevel  
68 proportional odds model(37,38). The model clustered observations by region, country, and  
69 individual to account for repeated measurements. Multilevel structure also allowed for  
70 country-level odds ratios to be related to the number of respondents, by shrinking odds ratios  
71 for countries with few respondents towards 1. This is a quantitative improvement on excluding  
72 sparse categories or combining them into an “Other” category(39).

### 73 Data processing and predictors

74 We categorized continuous variables to allow non-linearity with interpretable coefficients. We  
75 used all respondent and vignette data as predictors, including bivariate interactions between all  
76 vignette variables. Introducing interactions increased the number of parameters from 47 to  
77 501, therefore we chose prior distributions that prevent overfitting(40) (see Supplement).

### 78 Outputs

79 From the primary analysis, we reported odds ratios for main effects, interactions, and  
80 combinations of country- and region-level random intercepts. We quantified variability  
81 between individuals, countries, and regions using the median odds ratio.(41,42)

### 82 Secondary analyses

#### 83 Requests for additional information

84 We performed Bayesian multilevel logistic regression, with the same structure as the primary  
85 analysis, for whether each type of additional information was requested.

86 Comparing with observed data

87 We compared survey responses to observed data to address the common criticism of vignette-  
88 based surveys that their responses do not reflect real-world decision-making. To do so, we  
89 constructed a cohort of all observations of patients receiving oxygen via high-flow nasal cannula  
90 or non-invasive ventilation from the Medical Information Mart for Intensive Care IV (MIMIC-IV)  
91 database, similar to a prior study(15). For each observation, we used the model from the  
92 primary analysis to predict survey responses. Then, we compared the predicted survey  
93 responses to the observed outcome of intubation within 3, 8, or 24 hours.(15,43,44) We  
94 reported discrimination and calibration of the predicted recommendations versus observed  
95 intubation rates (Supplement, section 10).

## 96 Sensitivity analyses

97 We repeated the primary analysis using only respondents who completed 10 scenarios. We did  
98 this because some users were prematurely disconnected during high survey traffic. If they  
99 reattempted the survey, their data appeared as two separate respondents. Given that it is  
100 unlikely that someone who completed 10 scenarios would reattempt the survey, the 10-  
101 response subset likely consists of unique respondents.

102 We also repeated the primary analysis for responses restricted to each scenario diagnosis. This  
103 amounted to forcing an interaction between diagnosis and every other variable in the model. In  
104 a final sensitivity analysis, we assessed the proportional odds assumption.

## 105 Computational details and reporting

106 The survey interface was coded in R and shiny(31,45), and stored responses in REDcap.(46,47)  
107 We used R and the brms package for all Bayesian analyses.(48,49) Bayesian models used 4  
108 chains of 1000 iterations each, split between warm-up and sampling. We summarized posterior  
109 distributions with means and 95% credible intervals (CrI), used complete case analysis for  
110 modeling, and defined the region of practical equivalence as an odds ratio of 0.9 to 1.1.(50)

## 111 Results

### 112 Respondents

113 Between September 27, 2023 and January 11, 2024, 2,294 clinicians from 74 countries involved  
114 in the decision to intubate responded to the survey (Table 1). The top 5 countries were Canada  
115 (659, 29%), United States (597, 26%), France (199, 9%), Japan (187, 8%), and Thailand (121, 5%)  
116 (eFigure 5). Overall, 711 (31%) completed surveys in a non-English language, most commonly  
117 French (258, 11%), Japanese (174, 8%), and Spanish (107, 5%).

118 Critical care medicine was the primary clinical area of practice for 1,825 (80%). Multiple primary  
119 areas were selected by 334 (15%), including anesthesia and emergency medicine. Most  
120 respondents were attending physicians (1437, 63%), and 507 (22%) respondents were nurses or  
121 respiratory therapists. Median duration of practice was 11 years (interquartile range [IQR] 5 to  
122 20, eFigure 6).

### 123 Responses

124 We gathered 17,235 vignette responses from the 2,294 respondents. 1,372 (60%) answered 10  
125 scenarios (IQR 4 to 10, eFigure 7 & 8). Common responses included “Probable yes” (4,567,

126 26%), “Uncertain” (4,024, 23%), and “Probable no” (4,190, 24%). The remainder (22%) were  
127 either “Definite yes” or “Definite no.” Requests for additional information ranged from 11,450  
128 (66%) for arterial blood gas to 539 (3%) for esophageal manometry.

### 129 Primary analysis: Intubation recommendation

130 Several variables were associated with recommending intubation (Figure 1). Among clinician  
131 characteristics, a role of nurse or specialty of emergency medicine were associated with  
132 decreased odds of recommending intubation. Among patient characteristics, patient age,  
133 frailty, or diagnosis were not associated with recommending intubation. For oxygen saturation,  
134 inspired oxygen fraction, respiratory rate, breathing pattern, and level of consciousness,  
135 increasing derangement from normal was associated with increasing odds of recommending  
136 intubation (Figure 1). Only 2 of the 454 interaction term coefficients in the model had credible  
137 intervals not including 1, and in both cases this was likely artifactual due to limitations of an  
138 ordinal scale. (Supplement, section 8, eFigures 9 & 10).

### 139 Variation by individual, country, and region

140 We quantified variability between individuals, countries, and regions using the median odds  
141 ratio.(41,42) The median odds ratio between individuals within the same country was 2.60 (CrI  
142 2.48 to 2.73), indicating that randomly switching between individuals increased or decreased  
143 the odds of recommending intubation by an average factor of 2.6, after accounting for all other  
144 variables in the model. The median odds ratio between countries within the same region was  
145 1.56 (CrI 1.35 to 1.85), and 1.17 (CrI 1.01 to 1.63) between regions.

146 The odds ratio for recommending intubation by country varied, but there was important  
147 uncertainty in these estimates for most countries (Figure 2). Only 6 of 74 countries had odds  
148 ratios with 95% credible intervals that did not include 1: Bangladesh (OR 0.39, CrI 0.20 to 0.74),  
149 Canada (OR 0.53, CrI 0.40 to 0.70), United States of America (OR 0.63, CrI 0.48 to 0.84), Japan  
150 (OR 1.37, CrI 1.02 to 1.86), Thailand (OR 1.48, CrI 1.03 to 2.08), and Argentina (OR 2.23, CrI 1.31  
151 to 3.94).

#### 152 [Secondary analysis: Additional information](#)

153 Factors associated with requesting additional information varied by information type (Figure 3).  
154 No respondent or scenario variables were associated with requesting tidal volume or  
155 esophageal manometry. Nurse or respiratory therapist role was associated with increased odds  
156 of requesting arterial blood gas and chest x-ray, and respiratory therapist role was also  
157 associated with requesting PEEP information. Patient state of drowsy and not obeying was  
158 associated with increased odds of requesting an arterial blood gas, and decreased odds of  
159 requesting PEEP information or more observation time.

#### 160 [Secondary analysis: Comparison to observed data](#)

161 There were 18,263 observations from 826 patients in the MIMIC-IV cohort. Intubation occurred  
162 within 3, 8, and 24 hours following 745 (4%), 1,375 (8%), and 2,635 (14%) observations. The  
163 average predicted probabilities of each response across all cohort observations were: “Definite  
164 no” – 25%, “Probable no” – 41%, “Uncertain” – 20%, “Probable yes” – 11%, “Definite yes” – 3%.  
165 The probability of “Definite yes” recommendations was similar to the observed intubation rate  
166 within 3 hours, and the probability of “Definite yes” or “Probable yes” recommendations was  
167 similar to the probability of observed intubation within 24 hours (eFigure 11). Predicted



168 intubation recommendations of “Definite yes”, or “Definite yes and “Probable yes”, had similar  
169 discrimination with respect to intubation at 3 hours with an area under receiver operating  
170 curve of 0.71 (eFigures 12 & 13).

### 171 [Sensitivity analyses](#)

172 The sensitivity analyses limited to respondents with 10 responses (eFigures 14 & 15) or divided  
173 by diagnosis had similar results to the primary analysis (eFigures 16-20). The proportional odds  
174 assumption was supported for all variables except nurse respondent role (eFigures 21-24).

## 175 [Discussion](#)

176 In this survey of when to intubate patients with acute hypoxemic respiratory failure, we  
177 gathered 17,235 vignette-based intubation recommendations from 2,294 clinicians in 74  
178 countries. Oxygenation, breathing pattern, and level of consciousness had a strong influence on  
179 intubation recommendations, while diagnosis, norepinephrine use, and duration of symptoms  
180 did not. We also found important variation in recommendations across clinicians and countries.  
181 The results persisted in multiple sensitivity analyses, and the survey responses had good  
182 calibration and moderate discrimination with respect to external data. Our findings suggest  
183 important elements of criteria to guide intubation, but also highlight uncertainty as to which  
184 criteria may be optimal in a given scenario.

185 We found that oxygenation, breathing pattern, and level of consciousness were strongly  
186 associated with intubation recommendations. These variables are highly relevant to the  
187 decision to intubate, as evidenced by their inclusion as intubation criteria in clinical  
188 trials(23,51–53) and by qualitative and survey data.(11–13) Our findings are notable for the

189 magnitude of the odds ratios and the robust dose-response relationship between physiological  
190 derangement and probability of recommending intubation. For example, the probability of a  
191 respondent answering “Definite yes” or “Probable yes” increased from 33% to 53% after  
192 applying the odds ratio for use of neck muscles (2.32), and increased further to 76% after  
193 applying the odds ratio for use of neck muscles and abdominal paradox (6.39). The odds ratios  
194 relating to breathing pattern, inspired oxygen fraction, and level of consciousness were large  
195 enough that extreme values of any of these variables likely determine a clinician’s  
196 recommendation.

197 A respondent role of nurse was associated with modestly decreased odds of recommending  
198 intubation. Nurse respondents were also more likely to request arterial blood gases and chest  
199 x-rays. Potential explanations could include that nurses are not the final decision-maker, that  
200 nurses are less convinced of the benefits of invasive ventilation in a given scenario, or because  
201 higher rates of burnout in ICU nurses than ICU physicians(54) may contribute to a sense of  
202 therapeutic nihilism.

203 We identified several variables that were not associated with intubation recommendations,  
204 including diagnosis, norepinephrine use, duration in current state, and almost all of the 454  
205 interaction terms in the model. The findings for diagnosis, where not even COVID-19  
206 pneumonia was associated with decreased odds, suggest that intubation decisions are based on  
207 how a diagnosis affects oxygenation, breathing pattern, and level of consciousness, rather than  
208 on the diagnosis itself. Our findings are also consistent with other studies showing that  
209 norepinephrine use alone rarely determines intubation decision-making (16).

210 The lack of association between duration in current state or 99.5% of the interaction terms and  
211 intubation recommendations is somewhat surprising. Both clinical trajectory and the  
212 relationships between clinical variables have face validity as important components of  
213 intubation decision-making.(11) Although one explanation could be that “duration in current  
214 state” does not meaningfully capture clinical trajectory, our findings are consistent with cohort  
215 studies of patients with acute hypoxemic respiratory failure that suggest those who receive  
216 invasive ventilation are often those who fail to improve, and remain in the same (hypoxemic/  
217 tachypneic) state over time, as opposed to those who worsen.(55,56) Regarding interactions,  
218 our findings suggest that clinicians gravitate towards parsimonious, heuristic approaches which  
219 do not rely on interactions.(57,58)

220 We found important variation in intubation recommendations between individual clinicians and  
221 countries. The median change in odds of recommending intubation between two individuals  
222 from the same country was 2.60, which was numerically similar to the change in odds between  
223 patients on inspired oxygen of 1.0 versus 0.7, patients with and without neck muscle use, or  
224 patients who are drowsy but obeying versus alert. These findings may partially explain prior  
225 work showing surprisingly low rates of intubation in ICU patients with AHRF who attain  
226 relatively severe degrees of physiologic derangement.(15)

227 While variation between countries was less marked than variation between individuals, odds  
228 ratios by country ranged from 0.39 to 2.23. A case-based survey of 1,136 intensivists focused on  
229 COVID-19 pneumonia management also found large variation in the proportion of respondents  
230 recommending intubation, ranging from 0% in Australia-New Zealand to 23% in Asia.(13) Our  
231 finding that clinicians in Canada and the USA were so much less likely to recommend intubation

232 was striking, because health administrative data shows higher age-adjusted rates of invasive  
233 ventilation in both countries relative to the United Kingdom.(59) Potential explanations for  
234 country-level variation could relate to interpretation of the survey question, vignettes, and  
235 responses; access to resources including monitoring, non-invasive oxygen supports, and  
236 ventilators; or cultural, religious, and social practices and expectations regarding life support.

237 The most important limitation of our work is that a vignette-based survey is not guaranteed to  
238 reflect decisions made in clinical practice. Our secondary analysis using MIMIC-IV addresses this  
239 limitation, but provides only modest assurance that the survey responses match true clinical  
240 behaviour.

241 Selection bias due to non-response is another important limitation. We were unable to  
242 measure the response rate, which is one conventional way to assess vulnerability to selection  
243 bias. However, response rates in other surveys concerning intubation do not rule out the  
244 possibility of non-response bias(60), with rates ranging from 11% (12) to 50%(61). Surveys in  
245 other areas of critical care medicine have had response rates as low as 0.8%(62). Further, to  
246 calculate response rates, these surveys generally limited their distribution to medical societies  
247 with known membership. Our survey included non-physician clinicians involved in the decision  
248 to intubate, and physicians from countries and networks where the denominator is unknown.  
249 On balance, we felt that the benefits of a broader, larger sample more reflective of the global  
250 and team-based nature of intensive care medicine outweighed the potential harms of an  
251 unknown response rate.

252 Further limitations relate to survey design and modeling. The number of possible vignettes was  
253 much higher than the number of possible respondents, reflecting the multiplicative complexity  
254 of nuanced decision-making in medicine. This limited our ability to appreciate higher-order  
255 interactions. However, we obtained sufficient responses to evaluate bivariate interactions  
256 between any two variables. The proportional odds assumption implied by our modeling  
257 approach does not hold for all coefficients, based on our sensitivity analysis. However,  
258 proportional odds models can provide accurate treatment effect estimates even when there  
259 are deviations from the proportional odds assumption.(63–66) It was possible for respondents  
260 to complete the survey more than once, and so our primary analysis may be underestimating  
261 the individual-level variation. Reassuringly, our sensitivity analysis focused on those who fully  
262 completed the survey supported the primary analysis results.

## 263 Conclusion

264 In this survey of 2,294 clinicians from 74 countries, intubation recommendations for patients  
265 with AHRF were associated with oxygenation, breathing pattern, and level of consciousness,  
266 and varied across individuals and countries. These data can help justify and inform randomized  
267 trials of physiological thresholds to guide intubation decisions that may improve patient-  
268 important outcomes.

## Tables

Table 1

|                             | Total      | Northern America | Europe    | Asia      | Oceania   | Latin America and<br>the Caribbean | Africa    |
|-----------------------------|------------|------------------|-----------|-----------|-----------|------------------------------------|-----------|
| <b>Total</b>                | 2294       | 1256             | 458       | 421       | 72        | 68                                 | 19        |
| <b>Survey language</b>      |            |                  |           |           |           |                                    |           |
| Bahasa Indonesia            | < 5 (0%)   | 0 (0%)           | 0 (0%)    | < 5 (0%)  | 0 (0%)    | 0 (0%)                             | 0 (0%)    |
| Chinese (simplified)        | < 5 (0%)   | < 5 (0%)         | 0 (0%)    | < 5 (1%)  | 0 (0%)    | 0 (0%)                             | 0 (0%)    |
| English                     | 1583 (69%) | 1222 (97%)       | 113 (25%) | 154 (37%) | 72 (100%) | 10 (15%)                           | 12 (63%)  |
| German                      | 10 (0%)    | 0 (0%)           | 10 (2%)   | 0 (0%)    | 0 (0%)    | 0 (0%)                             | 0 (0%)    |
| French                      | 258 (11%)  | 31 (2%)          | 218 (48%) | 0 (0%)    | 0 (0%)    | < 5 (3%)                           | 7 (37%)   |
| Italian                     | 58 (3%)    | 0 (0%)           | 58 (13%)  | 0 (0%)    | 0 (0%)    | 0 (0%)                             | 0 (0%)    |
| Japanese                    | 174 (8%)   | 0 (0%)           | 0 (0%)    | 174 (41%) | 0 (0%)    | 0 (0%)                             | 0 (0%)    |
| Portuguese                  | 10 (0%)    | 0 (0%)           | < 5 (0%)  | 0 (0%)    | 0 (0%)    | 9 (13%)                            | 0 (0%)    |
| Spanish                     | 107 (5%)   | < 5 (0%)         | 58 (13%)  | 0 (0%)    | 0 (0%)    | 47 (69%)                           | 0 (0%)    |
| Thai                        | 88 (4%)    | 0 (0%)           | 0 (0%)    | 88 (21%)  | 0 (0%)    | 0 (0%)                             | 0 (0%)    |
| <b>Specialty</b>            |            |                  |           |           |           |                                    |           |
| Critical care medicine      | 1825 (80%) | 1051 (84%)       | 385 (84%) | 246 (58%) | 67 (93%)  | 61 (90%)                           | 15 (79%)  |
| Anesthesia                  | 302 (13%)  | 80 (6%)          | 91 (20%)  | 116 (28%) | 8 (11%)   | < 5 (3%)                           | 5 (26%)   |
| Emergency medicine          | 340 (15%)  | 192 (15%)        | 46 (10%)  | 89 (21%)  | < 5 (1%)  | 7 (10%)                            | 5 (26%)   |
| Other                       | 202 (9%)   | 97 (8%)          | 24 (5%)   | 73 (17%)  | 0 (0%)    | 5 (7%)                             | < 5 (16%) |
| <b>Role</b>                 |            |                  |           |           |           |                                    |           |
| Nurse                       | 310 (14%)  | 214 (17%)        | 58 (13%)  | 12 (3%)   | 24 (33%)  | < 5 (1%)                           | < 5 (5%)  |
| Attending physician         | 1437 (63%) | 689 (55%)        | 331 (72%) | 323 (77%) | 32 (44%)  | 49 (72%)                           | 13 (68%)  |
| Other clinical role         | 146 (6%)   | 106 (8%)         | 13 (3%)   | 18 (4%)   | < 5 (4%)  | 6 (9%)                             | 0 (0%)    |
| Trainee physician           | 204 (9%)   | 89 (7%)          | 40 (9%)   | 56 (13%)  | 11 (15%)  | < 5 (6%)                           | < 5 (21%) |
| Respiratory therapist       | 197 (9%)   | 158 (13%)        | 16 (3%)   | 12 (3%)   | < 5 (3%)  | 8 (12%)                            | < 5 (5%)  |
| <b>Duration in practice</b> |            |                  |           |           |           |                                    |           |
| 0-5 years                   | 662 (29%)  | 404 (32%)        | 111 (24%) | 109 (26%) | 13 (18%)  | 21 (31%)                           | < 5 (21%) |
| 6-10 years                  | 440 (19%)  | 232 (18%)        | 103 (22%) | 76 (18%)  | 18 (25%)  | < 5 (6%)                           | 7 (37%)   |
| 11-20 years                 | 486 (21%)  | 243 (19%)        | 113 (25%) | 99 (24%)  | 12 (17%)  | 14 (21%)                           | 5 (26%)   |
| 20-60 years                 | 686 (30%)  | 364 (29%)        | 127 (28%) | 136 (32%) | 28 (39%)  | 29 (43%)                           | < 5 (11%) |
| Missing                     | 20 (1%)    | 13 (1%)          | < 5 (1%)  | < 5 (0%)  | < 5 (1%)  | 0 (0%)                             | < 5 (5%)  |

Table 2

|                                         | <b>Total</b> | <b>Northern<br/>America</b> | <b>Europe</b> | <b>Asia</b> | <b>Oceania</b> | <b>Latin America and<br/>the Caribbean</b> | <b>Africa</b> |
|-----------------------------------------|--------------|-----------------------------|---------------|-------------|----------------|--------------------------------------------|---------------|
| <b>Responses</b>                        |              |                             |               |             |                |                                            |               |
| Total                                   | 17235        | 9168                        | 3605          | 3159        | 606            | 542                                        | 155           |
| Respondents                             | 2294         | 1256                        | 458           | 421         | 72             | 68                                         | 19            |
| Mean number per respondent              | 7.5          | 7.3                         | 7.9           | 7.5         | 8.4            | 8                                          | 8.2           |
| Respondents with 10 responses           | 1372 (60%)   | 712 (57%)                   | 294 (64%)     | 254 (60%)   | 54 (75%)       | 44 (65%)                                   | 14 (74%)      |
| <b>Recommendation</b>                   |              |                             |               |             |                |                                            |               |
| Definite yes                            | 2825 (16%)   | 1120 (12%)                  | 757 (21%)     | 667 (21%)   | 111 (18%)      | 139 (26%)                                  | 31 (20%)      |
| Probable yes                            | 4567 (26%)   | 2310 (25%)                  | 962 (27%)     | 915 (29%)   | 185 (31%)      | 162 (30%)                                  | 33 (21%)      |
| Uncertain                               | 4024 (23%)   | 2119 (23%)                  | 899 (25%)     | 699 (22%)   | 137 (23%)      | 132 (24%)                                  | 38 (25%)      |
| Probable no                             | 4190 (24%)   | 2533 (28%)                  | 691 (19%)     | 711 (23%)   | 133 (22%)      | 84 (15%)                                   | 38 (25%)      |
| Definite no                             | 1629 (9%)    | 1086 (12%)                  | 296 (8%)      | 167 (5%)    | 40 (7%)        | 25 (5%)                                    | 15 (10%)      |
| <b>Additional information requested</b> |              |                             |               |             |                |                                            |               |
| Arterial blood gas                      | 11450 (66%)  | 5821 (63%)                  | 2253 (62%)    | 2474 (78%)  | 410 (68%)      | 379 (70%)                                  | 113 (73%)     |
| Chest x-ray                             | 8294 (48%)   | 4454 (49%)                  | 1137 (32%)    | 1974 (62%)  | 383 (63%)      | 263 (49%)                                  | 83 (54%)      |
| More observation time                   | 6840 (40%)   | 3962 (43%)                  | 1261 (35%)    | 1098 (35%)  | 279 (46%)      | 163 (30%)                                  | 77 (50%)      |
| PEEP (if on NIV)                        | 4353 (25%)   | 2101 (23%)                  | 850 (24%)     | 1036 (33%)  | 211 (35%)      | 110 (20%)                                  | 45 (29%)      |
| Tidal volume (if on NIV)                | 3625 (21%)   | 1671 (18%)                  | 737 (20%)     | 908 (29%)   | 184 (30%)      | 105 (19%)                                  | 20 (13%)      |
| Esophageal pressure                     | 539 (3%)     | 84 (1%)                     | 207 (6%)      | 203 (6%)    | 10 (2%)        | 31 (6%)                                    | <5 (3%)       |

## Figures

### Figure 1: Posterior odds ratios for recommending intubation

Caption: This figure shows the posterior odds ratios across respondent, patient, and physiological variables for the strength of intubation recommendation (based on the ordinal response scale comprised of Definite no / Probable no / Uncertain / Probable Yes / Definite Yes). Odds ratios greater than 1 indicate variables associated with higher odds of recommending intubation, ie. a recommendation more towards the “Definite yes” end of the scale, whereas odds ratios less than 1 indicate variables associated with lower odds of recommending intubation, ie. a recommendation more towards the “Definite no” end of the scale.



### Posterior odds ratios for recommending intubation, by category of variable

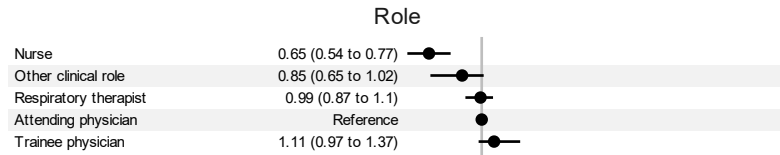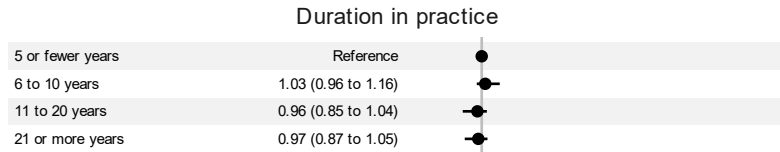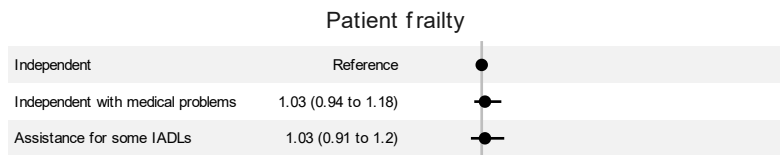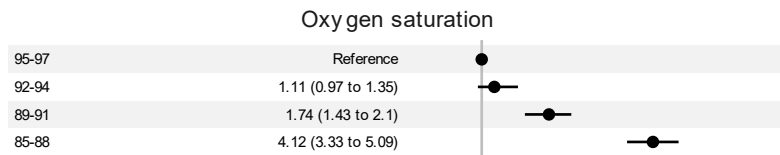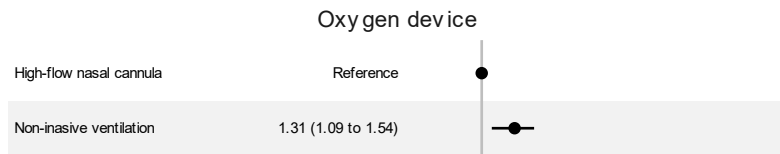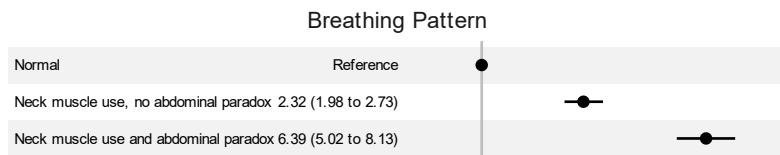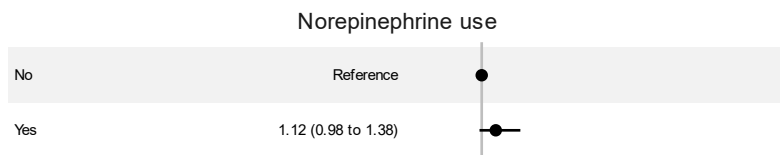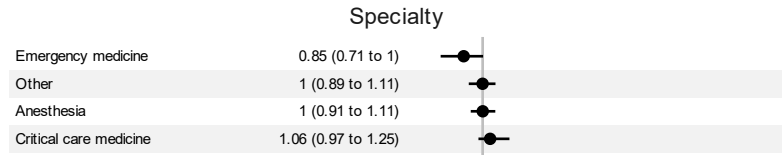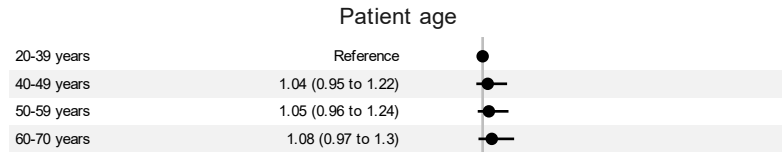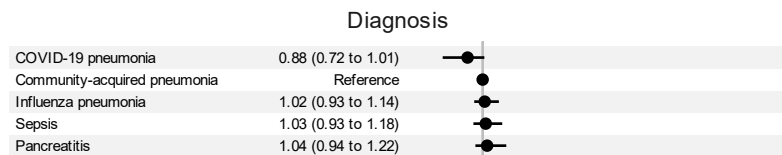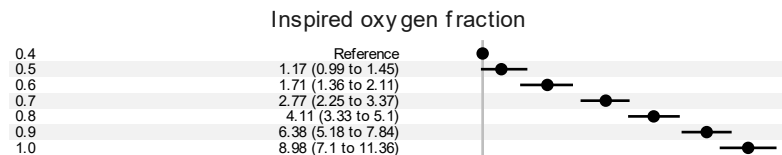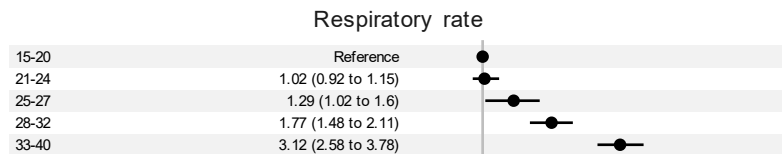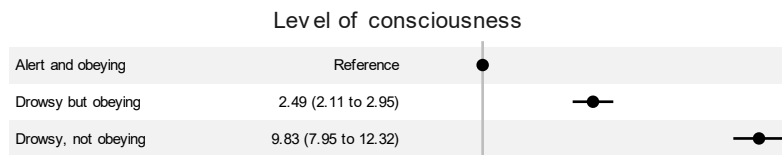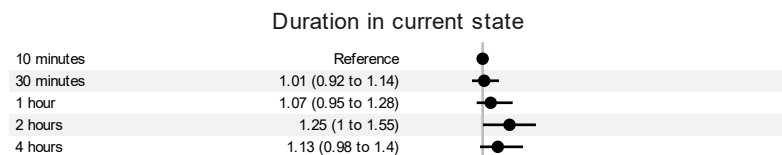

0.5 1.0 2.0 4.0 8.0

0.5 1.0 2.0 4.0 8.0

Posterior mean odds ratio (95% credible interval)

Odds ratios less than 1 = less likely to recommend intubation  
 Odds ratios more than 1 = more likely to recommend intubation

Figure 2: International variation in odds of recommending intubation

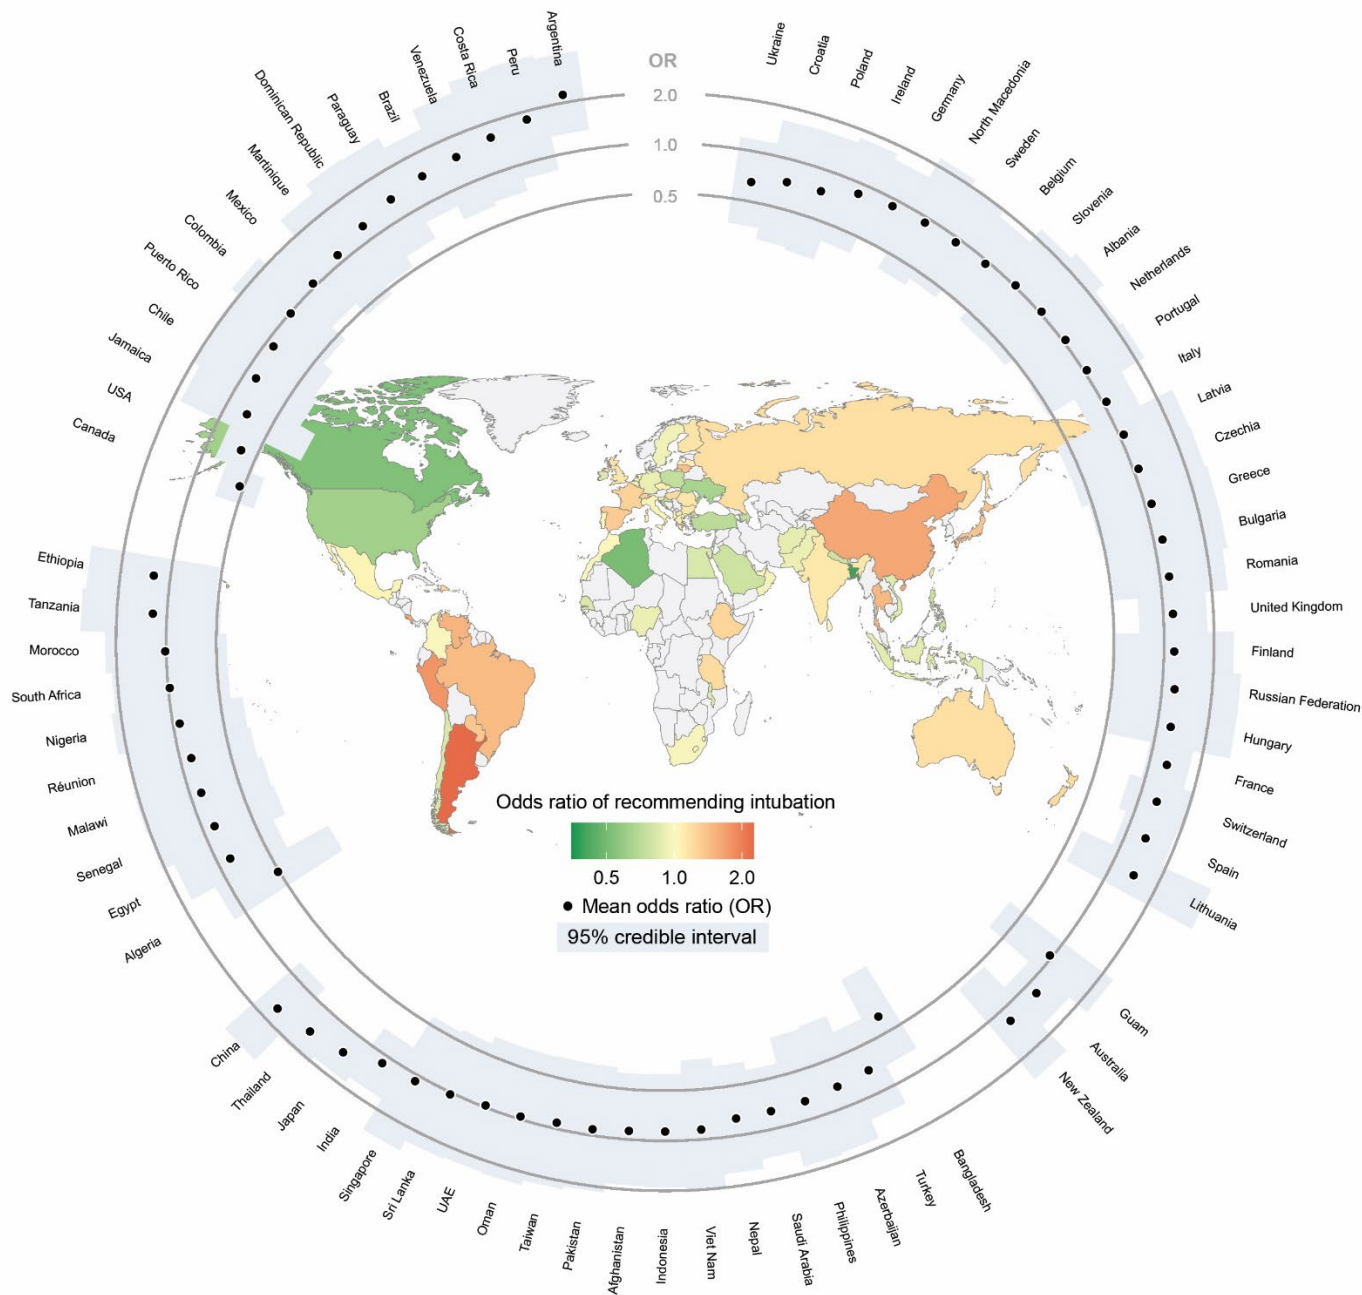

Caption: This figure shows the odds ratios for recommending intubation associated with respondent countries. The mean odds ratio is shown both as a black dot in the peripheral ring, and as the colour of the country within the map. The 95% credible interval or uncertainty or the estimate is shown by the size of the light blue bar in the peripheral ring. The odds ratios correspond to the combined random intercepts for region and country from the multilevel Bayesian proportional odds model. This means that countries with few respondents have wide uncertainty and their posterior estimates have been shrunk towards an odds ratio of 1.

Figure 3: Posterior odds ratios for requesting additional information

Arterial blood gas

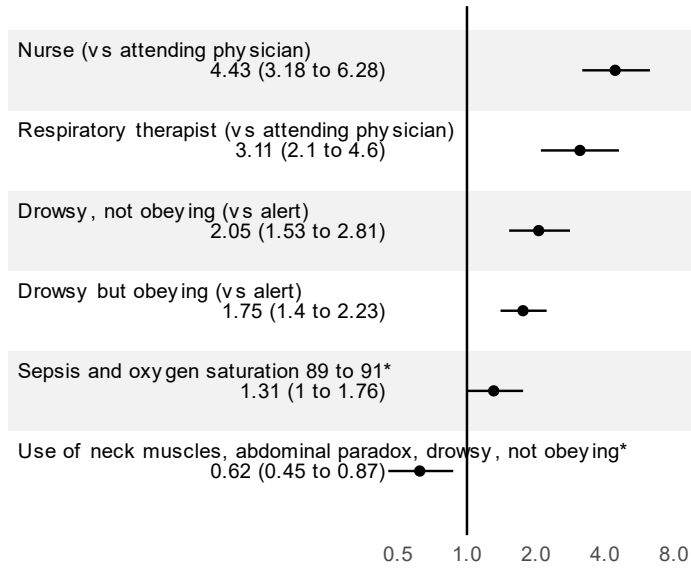

PEEP value (if on NIV)

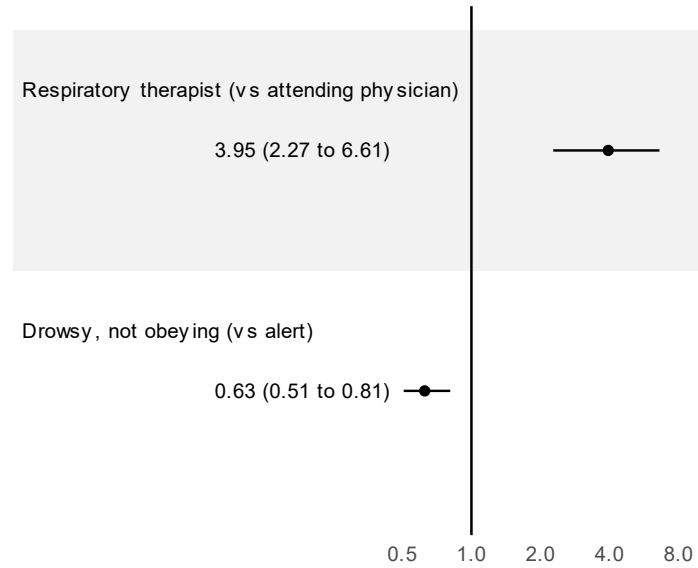

Chest x-ray

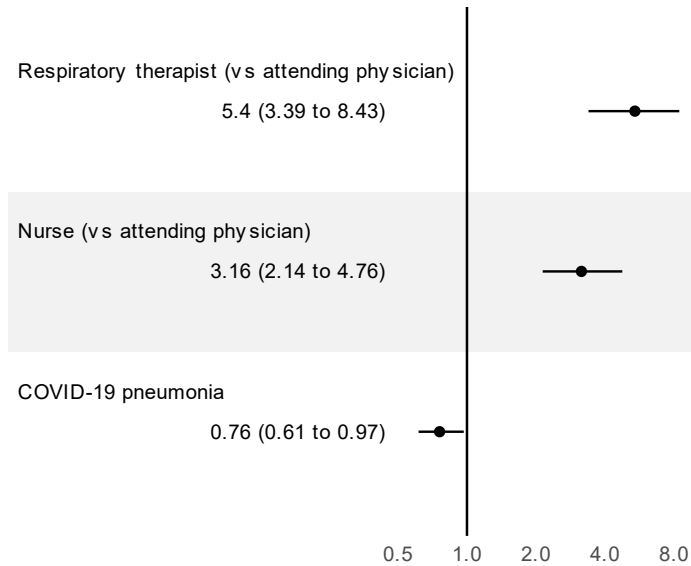

More observation time

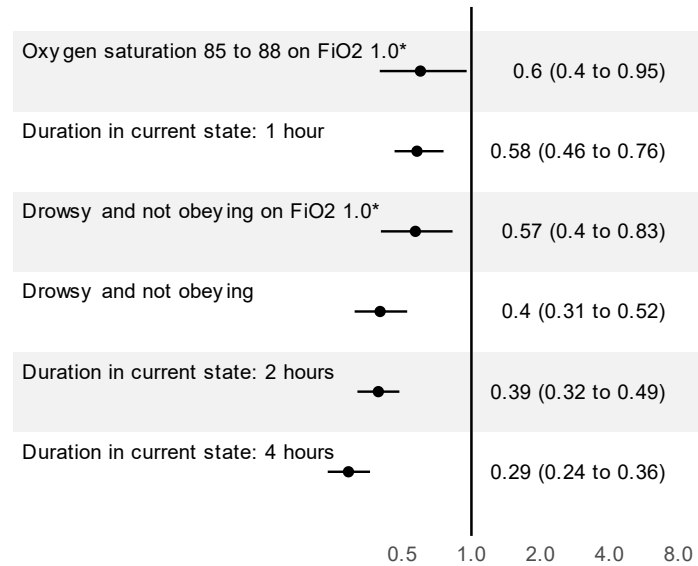

Caption: This figure shows the posterior odds ratios associated with requesting each additional type of information. For clarity, we present only the posterior odds ratios with 95% credible intervals that do not include 1. For two types of additional information (tidal volume if on non-invasive ventilation, and esophageal manometry), there were no odds ratios that met this criterion. PEEP = positive end-expiratory pressure, NIV = non-invasive ventilation, COVID-19 = coronavirus 2019. \*These odds ratios are interactions between the described variables.

## Data sharing statement

The data used in this study was deidentified and is available through reasonable request to the author. We plan to share the deidentified data through the Health Data Nexus repository (<https://healthdatanexus.ai/>) organized by the Temerty Center for Artificial Intelligence Research and Education in Medicine at the University of Toronto, in Toronto, Canada.

## References

1. Yarnell CJ, Patel BK. When Should We Intubate in Hypoxemic Respiratory Failure? NEJM Evidence. 2023 Feb 28;2(3):EVIDtt2200305.
2. Russotto V, Myatra SN, Laffey JG, Tassistro E, Antolini L, Bauer P, et al. Intubation Practices and Adverse Peri-intubation Events in Critically Ill Patients From 29 Countries. JAMA. 2021 Mar 23;325(12):1164–72.
3. Brodsky MB, Levy MJ, Jedlanek E, Pandian V, Blackford B, Price C, et al. Laryngeal Injury and Upper Airway Symptoms after Oral Endotracheal Intubation with Mechanical Ventilation During Critical Care: A Systematic Review. Crit Care Med. 2018 Dec;46(12):2010–7.
4. Papazian L, Klompas M, Luyt CE. Ventilator-associated pneumonia in adults: a narrative review. Intensive Care Med. 2020;46(5):888–906.
5. Slutsky AS, Ranieri VM. Ventilator-induced lung injury. N Engl J Med. 2013 Nov 28;369(22):2126–36.
6. Vanhorebeek I, Latronico N, Van den Berghe G. ICU-acquired weakness. Intensive Care Med. 2020;46(4):637–53.
7. Herridge MS, Chu LM, Matte A, Tomlinson G, Chan L, Thomas C, et al. The RECOVER Program: Disability Risk Groups and 1-Year Outcome after 7 or More Days of Mechanical Ventilation. American Journal of Respiratory and Critical Care Medicine. 2016 Oct;194(7):831–44.
8. Mosier JM, Sakles JC, Law JA, Brown CA, Brindley PG. Tracheal Intubation in the Critically Ill. Where We Came from and Where We Should Go. Am J Respir Crit Care Med. 2020 Apr;201(7):775–88.
9. Grieco DL, Menga LS, Eleuteri D, Antonelli M. Patient self-inflicted lung injury: implications for acute hypoxemic respiratory failure and ARDS patients on non-invasive support. Minerva Anestesiol. 2019 Sep;85(9):1014–23.
10. Telias I, Brochard LJ, Gattarello S, Wunsch H, Junhasavasdikul D, Bosma KJ, et al. The physiological underpinnings of life-saving respiratory support. Intensive Care Med. 2022 Oct 1;48(10):1274–86.
11. Bauer PR, Kumbamu A, Wilson ME, Pannu JK, Egginton JS, Kashyap R, et al. Timing of Intubation in Acute Respiratory Failure Associated With Sepsis: A Mixed Methods Study. Mayo Clinic Proceedings. 2017 Oct;92(10):1502–10.
12. de Montmollin E, Aboab J, Ferrer R, Azoulay E, Annane D. Criteria for initiation of invasive ventilation in septic shock: An international survey. Journal of Critical Care. 2016 Feb;31(1):54–7.
13. Azoulay E, de Waele J, Ferrer R, Staudinger T, Borkowska M, Pova P, et al. International variation in the management of severe COVID-19 patients. Critical Care. 2020 Aug 5;24(1):486.
14. Doidge JC, Gould DW, Ferrando-Vivas P, Mouncey PR, Thomas K, Shankar-Hari M, et al. Trends in Intensive Care for Patients with COVID-19 in England, Wales, and Northern Ireland. Am J Respir Crit Care Med. 2021 Mar;203(5):565–74.

15. Yarnell CJ, Johnson A, Dam T, Jonkman A, Liu K, Wunsch H, et al. Do Thresholds for Invasive Ventilation in Hypoxemic Respiratory Failure exist? A Cohort Study. *Am J Respir Crit Care Med*. 2023 Feb;207(3):271–82.
16. Darreau C, Martino F, Saint-Martin M, Jacquier S, Hamel JF, Nay MA, et al. Use, timing and factors associated with tracheal intubation in septic shock: a prospective multicentric observational study. *Annals of Intensive Care*. 2020 Dec;10(1).
17. Bellani G, Laffey JG, Pham T, Madotto F, Fan E, Brochard L, et al. Noninvasive Ventilation of Patients with Acute Respiratory Distress Syndrome: Insights from the LUNG SAFE Study. *American Journal of Respiratory and Critical Care Medicine*. 2017 Jan;195(1):67–77.
18. Abdelmalek FM, Angriman F, Moore J, Liu K, Burry L, Seyyed-Kalantari L, et al. Association between Patient Race and Ethnicity and Use of Invasive Ventilation in the United States. *Annals ATS*. 2024 Feb;21(2):287–95.
19. Burns KEA, Duffett M, Kho ME, Meade MO, Adhikari NKJ, Sinuff T, et al. A guide for the design and conduct of self-administered surveys of clinicians. *Cmaj*. 2008 Jul;179(3):245–52.
20. Sharma A, Minh Duc NT, Luu Lam Thang T, Nam NH, Ng SJ, Abbas KS, et al. A Consensus-Based Checklist for Reporting of Survey Studies (CROSS). *J Gen Intern Med*. 2021 Oct;36(10):3179–87.
21. Yarnell C. WhenToIntubate Survey Analysis Plan . Open Science Framework; 2024 [cited 2024 Feb 9]. Available from: <https://osf.io/kfnpm>
22. Zdravkovic M, Berger-Estilita J, Sorbello M, Hagberg CA. An international survey about rapid sequence intubation of 10,003 anaesthetists and 16 airway experts. *Anaesthesia*. 2020 Mar;75(3):313–22.
23. Hakim R, Watanabe-Tejada L, Sukhal S, Tulaimat A. Acute respiratory failure in randomized trials of noninvasive respiratory support: A systematic review of definitions, patient characteristics, and criteria for intubation. *Journal of Critical Care*. 2020 Jun;57:141–7.
24. Yarnell CJ, Angriman F, Ferreyro BL, Liu K, De Grooth HJ, Burry L, et al. Oxygenation thresholds for invasive ventilation in hypoxemic respiratory failure: a target trial emulation in two cohorts. *Critical Care*. 2023 Feb 22;27(1):67.
25. Parthasarathy S, Jubran A, Laghi F, Tobin MJ. Sternomastoid, rib cage, and expiratory muscle activity during weaning failure. *J Appl Physiol (1985)*. 2007 Jul;103(1):140–7.
26. Pozzi M, Rezoagli E, Bronco A, Rabboni F, Grasselli G, Foti G, et al. Accessory and Expiratory Muscles Activation During Spontaneous Breathing Trial: A Physiological Study by Surface Electromyography. *Front Med (Lausanne)*. 2022 Mar 10;9:814219.
27. Schmidt M, Kindler F, Gottfried SB, Raux M, Hug F, Similowski T, et al. Dyspnea and surface inspiratory electromyograms in mechanically ventilated patients. *Intensive Care Med*. 2013 Aug 1;39(8):1368–76.

28. Hudson AL, Gandevia SC, Butler JE. The effect of lung volume on the co-ordinated recruitment of scalene and sternomastoid muscles in humans. *J Physiol*. 2007 Oct 1;584(Pt 1):261–70.
29. Surveys . ESICM. [cited 2024 Feb 12]. Available from: <https://www.esicm.org/research/surveys/>
30. Evans SC, Roberts MC, Keeley JW, Blossom JB, Amaro CM, Garcia AM, et al. Vignette methodologies for studying clinicians' decision-making: Validity, utility, and application in ICD-11 field studies. *Int J Clin Health Psychol*. 2015;15(2):160–70.
31. Kaufman AR. Implementing novel, flexible, and powerful survey designs in R Shiny. *PLoS One*. 2020 Apr 30;15(4):e0232424.
32. Sheringham J, Kuhn I, Burt J. The use of experimental vignette studies to identify drivers of variations in the delivery of health care: a scoping review. *BMC Medical Research Methodology*. 2021 Apr 22;21(1):81.
33. Rockwood K, Song X, MacKnight C, Bergman H, Hogan DB, McDowell I, et al. A global clinical measure of fitness and frailty in elderly people. *CMAJ*. 2005 Aug 30;173(5):489–95.
34. McColl E, Jacoby A, Thomas L, Soutter J, Bamford C, Steen N, et al. Design and use of questionnaires: a review of best practice applicable to surveys of health service staff and patients. *Health Technol Assess*. 2001;5(31):1–256.
35. Atzmüller C, Steiner PM. Experimental Vignette Studies in Survey Research. *Methodology*. 2010 Jan;6(3):128–38.
36. ISO . [cited 2024 Feb 13]. ISO - ISO 3166 — Country Codes. Available from: <https://www.iso.org/iso-3166-country-codes.html>
37. Hastie T, Tibshirani R. Non-Parametric Logistic and Proportional Odds Regression. *Journal of the Royal Statistical Society: Series C (Applied Statistics)*. 1987;36(3):260–76.
38. French B, Shotwell MS. Regression Models for Ordinal Outcomes. *JAMA*. 2022 Aug 23;328(8):772–3.
39. Oganisian A, Roy JA. A practical introduction to Bayesian estimation of causal effects: Parametric and nonparametric approaches. *Statistics in Medicine*. 2021 Jan;40(2):518–51.
40. Piironen J, Vehtari A. Sparsity information and regularization in the horseshoe and other shrinkage priors. *Electronic Journal of Statistics*. 2017 Jan;11(2):5018–51.
41. Merlo J, Chaix B, Yang M, Lynch J, Raastam L. A brief conceptual tutorial of multilevel analysis in social epidemiology: Linking the statistical concept of clustering to the idea of contextual phenomenon. *Journal of Epidemiology and Community Health*. 2005 Jun;59(6):443–9.
42. Austin PC, Merlo J. Intermediate and advanced topics in multilevel logistic regression analysis. *Statistics in Medicine*. 2017 Sep;36(20):3257–77.



43. Goldberger AL, Amaral LA, Glass L, Hausdorff JM, Ivanov PC, Mark RG, et al. PhysioBank, PhysioToolkit, PhysioNet: Components of a new research resource for complex physiologic signals. *Circulation*. 2000 Jun;101(23):E215-20.
44. Johnson A, Bulgarelli L, Pollard T, Horng S, Celi LA, Mark R. MIMIC-IV (version 0.4) . PhysioNet; 2020. Available from: <https://doi.org/10.13026/a3wn-hq05>
45. Chang W, Cheng J, Allaire J, Sievert C, Schloerke B, Xie Y, et al. shiny: Web application framework for R . 2024 [cited 2024 Feb 12]. Available from: <https://shiny.posit.co/>
46. Harris PA, Taylor R, Thielke R, Payne J, Gonzalez N, Conde JG. Research electronic data capture (REDCap)—A metadata-driven methodology and workflow process for providing translational research informatics support. *Journal of Biomedical Informatics*. 2009 Apr 1;42(2):377–81.
47. Harris PA, Taylor R, Minor BL, Elliott V, Fernandez M, O’Neal L, et al. The REDCap consortium: Building an international community of software platform partners. *Journal of Biomedical Informatics*. 2019 Jul 1;95:103208.
48. R Core Team. R: A Language and Environment for Statistical Computing . Vienna, Austria: R Foundation for Statistical Computing; 2020. Available from: <https://www.r-project.org>
49. Bürkner PC. brms: An R package for Bayesian multilevel models using Stan. *Journal of Statistical Software*. 2017 Aug;80(1):1–28.
50. Zampieri FG, Casey JD, Shankar-Hari M, Harrell FE, Harhay MO. Using Bayesian Methods to Augment the Interpretation of Critical Care Trials. An Overview of Theory and Example Reanalysis of the Alveolar Recruitment for Acute Respiratory Distress Syndrome Trial. *Am J Respir Crit Care Med*. 2021 Mar;203(5):543–52.
51. Frat JP, Thille AW, Mercat A, Girault C, Ragot S, Perbet S, et al. High-flow oxygen through nasal cannula in acute hypoxemic respiratory failure. *New England Journal of Medicine*. 2015 Jun;372(23):2185–96.
52. Frat JP, Quenot JP, Badie J, Coudroy R, Guitton C, Ehrmann S, et al. Effect of High-Flow Nasal Cannula Oxygen vs Standard Oxygen Therapy on Mortality in Patients With Respiratory Failure Due to COVID-19: The SOHO-COVID Randomized Clinical Trial. *JAMA*. 2022 Sep 27;328(12):1212–22.
53. Grieco DL, Menga LS, Cesarano M, Rosà T, Spadaro S, Bitondo MM, et al. Effect of Helmet Noninvasive Ventilation vs High-Flow Nasal Oxygen on Days Free of Respiratory Support in Patients With COVID-19 and Moderate to Severe Hypoxemic Respiratory Failure: The HENIVOT Randomized Clinical Trial. *JAMA*. 2021 May 4;325(17):1731–43.
54. Papazian L, Hraiech S, Loundou A, Herridge MS, Boyer L. High-level burnout in physicians and nurses working in adult ICUs: a systematic review and meta-analysis. *Intensive Care Med*. 2023 Apr 1;49(4):387–400.
55. Roca O, Caralt B, Messika J, Samper M, Sztrymf B, Hernández G, et al. An index combining respiratory rate and oxygenation to predict outcome of nasal high-flow therapy. *American Journal of Respiratory and Critical Care Medicine*. 2019 Jun;199(11):1368–76.

56. Tonelli R, Fantini R, Tabbi L, Castaniere I, Pisani L, Pellegrino MR, et al. Inspiratory Effort Assessment by Esophageal Manometry Early Predicts Noninvasive Ventilation Outcome in de novo Respiratory Failure: A Pilot Study. *American Journal of Respiratory and Critical Care Medicine*. 2020 Apr;202:558–67.
57. Kahneman D. *Thinking, Fast and Slow*. Doubleday Canada; 2011. 614 p.
58. Webster CS, Taylor S, Weller JM. Cognitive biases in diagnosis and decision making during anaesthesia and intensive care. *BJA Education*. 2021 Nov;21(11):420.
59. Jivraj NK, Hill AD, Shieh MS, Hua M, Gershengorn HB, Ferrando-Vivas P, et al. Use of Mechanical Ventilation Across 3 Countries. *JAMA Intern Med*. 2023 Aug 1;183(8):824–31.
60. Davern M. Nonresponse Rates are a Problematic Indicator of Nonresponse Bias in Survey Research. *Health Serv Res*. 2013 Jun;48(3):905–12.
61. Green MD, Fergusson P, Turgeon MD, McIntyre MD, Kovacs MD, Griesdale MD, et al. Resuscitation Prior to Emergency Endotracheal Intubation: Results of a National Survey. *Western Journal of Emergency Medicine: Integrating Emergency Care with Population Health*. 2016 [cited 2024 Feb 15];17(5). Available from: <https://escholarship.org/uc/item/3t00r076>
62. Dilawri A, Muir J, Brodie D, Abrams D, Agerstrand C, Madahar P, et al. Practices surrounding antimicrobial use in patients managed with extracorporeal membrane oxygenation: An international survey. *Journal of Critical Care*. 2024 Jun 1;81:154534.
63. Senn S, Julious S. Measurement in clinical trials: A neglected issue for statisticians? *Statistics in Medicine*. 2009;28(26):3189–209.
64. Harrell FE Jr. *Regression Modeling Strategies - With Applications to Linear Models, Logistic Regressions, and Survival Analysis*. Vol. 26. Springer New York; 2001. 251–264 p.
65. Harrell F. *Statistical Thinking - Assessing the Proportional Odds Assumption and Its Impact* . 2022 [cited 2024 Jan 8]. Available from: <https://www.fharrell.com/post/impactpo/>
66. Harrell F. *Statistical Thinking - Violation of Proportional Odds is Not Fatal*. 2020 [cited 2024 Feb 15]. Available from: <https://www.fharrell.com/post/po/>
